# Supplementary material for: Welche Klimadimensionen misst der Linzer Fragebogen zum Schul- und Klassenklima für die 4. – 8. Klasse (LFSK 4 – 8; Eder, 2000)?
Source: Atypon-hosted journal article supplement (doi:10.1026/0012-1924/a000280), 2021-12-10
Supplement: 0012-1924_a000280_esm1.pdf [file 0012-1924_a000280_esm1.pdf]

*Elektronisches Supplement 1. Zuordnung der Elemente zu den Dimensionen des Klimas in Schulklassen nach Eder und Mayr (2000).*

| Klimaelemente               | Klimadimensionen mit Inhaltsbeschreibungen und Itembeispielen                                                                |
|-----------------------------|------------------------------------------------------------------------------------------------------------------------------|
|                             | <i>Sozial- und Leistungsdruck</i>                                                                                            |
| Gerechtigkeit (-)           | Autoritäres, als unfair empfundenes Lehrerverhalten, hohes Unterrichtstempo, individuelle Überforderung                      |
| Restriktivität              | Die Lehrer geben sich Mühe, alle Schüler fair zu behandeln.                                                                  |
| Komparation                 | Wenn jemand nicht gut mitarbeitet, wird sofort mit einer schlechten Note gedroht.                                            |
| Leistungsdruck              | Wenn wir eine Klassenarbeit zurückbekommen, werden die besten und die schlechtesten Arbeiten vor der Klasse besprochen.      |
| Unterrichtsdruck            | Wenn man ein paar Tage fehlte, muss man sehr viel nachlernen.                                                                |
|                             | <i>Schülerzentriertheit</i>                                                                                                  |
| Pädagogisches Engagement    | Zugewandtes, nicht-lenkendes Lehrerverhalten, Beteiligung der Schülerinnen und Schüler an Entscheidungen, Leistungskontrolle |
| Vermittlungsqualität        | Ich glaube, den Lehrern ist es sehr wichtig, dass wir etwas verstehen.                                                       |
| Mitsprache                  | Unsere Lehrer können auch komplizierte Dinge so gut erklären, dass wir sie verstehen.                                        |
| Schülerbeteiligung          | Unsere Lehrer entscheiden vieles mit uns gemeinsam.                                                                          |
| Kontrolle der Schülerarbeit | Unsere Lehrer unterrichten so, dass die Schüler immer die Möglichkeit haben eigene Gedanken einbringen zu können.            |
|                             | <i>Lerngemeinschaft</i>                                                                                                      |
| Gemeinschaft                | Klassenkohäsion, Lernbereitschaft der Klasse                                                                                 |
| Lernbereitschaft            | Bei uns lässt niemand einen Schüler aus der Klasse hängen.                                                                   |
|                             | <i>Rivalität und Störneigung</i>                                                                                             |
| Rivalität                   | Konkurrenzstreben zu Lasten der Mitschülerinnen und Mitschüler, individuelles undiszipliniertes und störendes Verhalten      |
| Störung                     | Wenn jemand etwas Falsches sage, freuen sich die anderen heimlich darüber.                                                   |
|                             | Manche Schüler stören immer wieder den Unterricht.                                                                           |

*Anmerkungen.* Zur Darstellung wurden die Items in ihrer Originalversion paraphrasiert. Für die jeweils durch eine Summe von drei Items geschätzten Klimaelemente ergaben sich in der Normstichprobe Mittelwerte von  $7.56 \leq M \leq 11.66$  ( $2.58 \leq SD \leq 3.18$ ). Für etwa 70 % der Klimaratings wurden Schwierigkeitsindizes zwischen  $.35 < p < .64$  festgestellt. Die Schwierigkeitsindizes berechneten Eder & Mayr (2000) „nach der Formel  $\frac{(M-1)}{(k-1)}$ , wobei  $M$  den Mittelwert des Items und  $k$  die Anzahl der möglichen Antwortstufen bedeutet“ (Eder & Mayr, 2000, S.16). Schätzungen der internen Konsistenzen der Klimaelemente ergaben Werte von  $.48 \leq \alpha \leq .72$  auf Individualebene und von  $.70 \leq \alpha \leq .92$  auf Klassenebene.
