# Supplementary material for: Welche Klimadimensionen misst der Linzer Fragebogen zum Schul- und Klassenklima für die 4. – 8. Klasse (LFSK 4 – 8; Eder, 2000)?
Source: Atypon-hosted journal article supplement (doi:10.1026/0012-1924/a000280), 2021-12-10
Supplement: 0012-1924_a000280_esm2.pdf [file 0012-1924_a000280_esm2.pdf]

*Elektronisches Supplement 2. Erläuterung der sequenziell geprüften Modellannahmen.*

Da im vorliegenden Anwendungsfall auf der Klassen- resp. der Individualebene verschiedene Variablen betrachtet werden (Klassenmittel vs. individuelle Abweichungen vom Klassenmittel), kann keine Messinvarianz im eigentlichen Sinne überprüft werden. Wir sprechen daher im Folgenden von Äquivalenz oder Invarianz.

Konkret sollte überprüft werden, ob das Modell einer konfiguralen oder das einer metrischen Äquivalenz für die Abbildung der Klimadimensionen auf Ebene der Schülerschaft und auf Klassenebene gültig ist. Die Modelle unterscheiden sich in der Restriktivität ihrer Annahmen über die Gleichheit von Modellparametern beider Ebenen. Träfe das Modell der konfiguralen Äquivalenz auf die Abbildung der Klimadimensionen zu, würde auf beiden Ebenen das gleiche Messmodell mit den gleichen Parametern geschätzt, jedoch dürften diese unterschiedliche Werte annehmen. Mit anderen Worten: Die manifesten Indikatoren der Klimaelemente würden auf beiden Ebenen auf identischen latenten Klimadimensionen laden, allerdings mit unterschiedlichen Skalen. Dies würde bedeuten, dass sich die individuelle wahre Abweichung der Bewertung einer spezifischen Klimadimension vom Klassenmittelwert linear in den zugehörigen wahren Wert auf Klassenebene transformieren ließe et vice versa. Das Modell der metrischen Äquivalenz geht über die konfigurale hinaus und nimmt zusätzlich äquivalente Faktorenladungen an. Wäre dieses Modell gegeben, würden sich die wahren Werte (individuelle Abweichungen von den Klassenmittelwerten bzw. Klassenmittelwerte) einer jeden Klimadimension auf Individual- und Klassenebene nur durch eine additive Konstante unterscheiden. Folglich könnte davon ausgegangen werden, dass die latenten Klimadimensionen auf Ebene der Schülerschaft und auf Klassenebene die gleiche Bedeutung haben, also gleichermaßen wahrgenommen werden.
