# Supplementary material for: Welche Klimadimensionen misst der Linzer Fragebogen zum Schul- und Klassenklima für die 4. – 8. Klasse (LFSK 4 – 8; Eder, 2000)?
Source: Atypon-hosted journal article supplement (doi:10.1026/0012-1924/a000280), 2021-12-10
Supplement: 0012-1924_a000280_esm3.pdf [file 0012-1924_a000280_esm3.pdf]

*Elektronisches Supplement 3. Beschreibung der Modelle.*

Um die Frage nach der Angemessenheit der Mehrebenen-Faktorenanalyse umfassend zu beurteilen, wurden vorab, in ihrer Struktur dem ML-CFM-Modell äquivalente, konfirmatorische Einebenen-Faktormodelle (SL-CFM) für die Schülerurteile der Gesamtstichprobe (SL-CFM-G), für die Abweichungen der individuellen Schülerurteile von den Klassenmittelwerten (SL-CFM-L1) sowie für die Klassenmittelwerte (SL-CFM-L2) gerechnet.

Im Modell 1 (SL-CFM-G), wird die Mehrebenen-Datenstruktur *nicht* berücksichtigt. Für die beim Fall  $i$  beobachteten Klimavariablen im Vektor  $Y_i$  stellen wir ein Messmodell mit  $k$  latenten Klimadimensionen im Vektor  $\eta_i$ , einer Ladungsmatrix  $\Lambda$  und Residuen im Vektor  $\varepsilon_i$  auf (vgl. Gleichung 1).

$$Y_i = \Lambda \eta_i + \varepsilon_i \quad (1)$$

Es sind keine Ordinatenabschnitte vorhanden, weil in unsere Studie die manifesten Variablen (die Klimaelemente) am jeweiligen Globalmittel zentriert wurden.

Das Faktormodell auf Ebene L1, Modell 2 (SL-CFM-L1), definiert latente Klimadimensionen auf Schülerebene und basiert auf der Kovarianzmatrix der klassenintern zentrierten Klimaelemente. Gleichung 2 zeigt das Messmodell für die beim Fall  $i$  in der Klasse  $g$  beobachteten individuellen Abweichungen von den Erwartungswerten der Klasse  $g$ . Diese Abweichungen werden erklärt durch die latenten Klimadimensionen im Vektor  $\eta_{Wgi}$ , die Ladungsmatrix  $\Lambda_W$  sowie die Residuen im Vektor  $\varepsilon_{Wgi}$ . Weil die latenten Klimadimensionen im Vektor  $\eta_{Wgi}$  sowie die Residuen im Vektor  $\varepsilon_{Wgi}$  definitionsgemäß den Mittelwert null besitzen, enthält  $\mu_g$  die Mittelwerte der beobachteten Klimavariablen für die Klasse  $g$ .

$$Y_{gi} - \mu_g = \Lambda_W \eta_{Wgi} + \varepsilon_{Wgi} \quad (2)$$

Das Faktormodell auf Ebene L2, Modell 3 (SL-CFM-L2), definiert latente Klimadimensionen auf Klassenebene und basiert auf der Kovarianzmatrix der aggregierten Klimabewertungen. Es erklärt die Erwartungswerte der Klasse  $g$  durch die latenten Klimadimensionen  $\eta_{Bg}$  auf Klassenebene, die Ladungsmatrix  $\Lambda_B$  und die Residuen im Vektor  $\varepsilon_{Bg}$  (vgl. Gleichung 3).

$$\mu_g = \Lambda_B \eta_{Bg} + \varepsilon_{Bg} \quad (3)$$

Es sind keine Ordinatenabschnitte vorhanden, weil in unsere Studie die Klimaelemente am jeweiligen Globalmittel zentriert wurden.

In einem weiteren Auswertungsschritt wurden die partiellen Modelle 2 und 3 in den Mehrebenen-Modellen, Modelle 4 und 5 (ML-CFM), zusammengeführt und simultan analysiert. In diesen Modellen werden je vier latente Klimadimensionen auf Schüler- und Klassenebene definiert (vgl. Gleichung 4). Mit diesen Modellen wurde die konfigurale Invarianz des LFSK 4-8 über Schüler- und Klassenebene getestet.

$$Y_{gi} = \Lambda_B \eta_{Bg} + \varepsilon_{Bg} + \Lambda_W \eta_{Wgi} + \varepsilon_{Wgi} \quad (4)$$

Darüber hinaus wurde die metrische Invarianz des LFSK 4-8 über Schüler- und Klassenebene überprüft. Gleichung 5 definiert das zugehörige Mehrebenen-Modell, Modell 6, mit gleichgesetzten Faktorladungen auf L1 und L2.

$$Y_{gi} = \Lambda (\eta_{Bg} + \eta_{Wgi}) + \varepsilon_{Bg} + \varepsilon_{Wgi} \quad (5)$$
