# Supplementary material for: Welche Klimadimensionen misst der Linzer Fragebogen zum Schul- und Klassenklima für die 4. – 8. Klasse (LFSK 4 – 8; Eder, 2000)?
Source: Atypon-hosted journal article supplement (doi:10.1026/0012-1924/a000280), 2021-12-10
Supplement: 0012-1924_a000280_esm4.pdf [file 0012-1924_a000280_esm4.pdf]

*Elektronisches Supplement 4. Ergebnisse zu Verteilungseigenschaften, Intraklassenkorrelationskoeffizienten (ICC1) und den Reliabilitätsschätzungen für die durchschnittlichen Bewertungen der Klimaelemente auf Ebene der Schulklassen (ICC2).*

| Klimaelement             | <i>M</i> | <i>SD</i> | <i>g</i><br><i>SF<sub>g</sub></i> = .054 | <i>Kurt</i><br><i>SF<sub>Kurt</sub></i> = .107 | ICC1 | ICC2 |
|--------------------------|----------|-----------|------------------------------------------|------------------------------------------------|------|------|
| Gemeinschaft             | 3.583    | .859      | -.576**                                  | .409**                                         | .072 | .627 |
| Gerechtigkeit            | 3.306    | .993      | -.325**                                  | -.446**                                        | .145 | .786 |
| Komparation              | 2.379    | .972      | .698**                                   | .113                                           | .059 | .575 |
| Kontrolle                | 3.477    | .759      | -.124*                                   | .059                                           | .092 | .688 |
| Leistungsdruck           | 3.305    | .804      | .203**                                   | -.221*                                         | .053 | .550 |
| Lernbereitschaft         | 3.130    | .817      | -.154**                                  | .189*                                          | .102 | .711 |
| Mitsprache               | 2.931    | .911      | -.116*                                   | -.243*                                         | .094 | .692 |
| Pädagogisches Engagement | 3.320    | .929      | -.386**                                  | -.057                                          | .141 | .781 |
| Restriktivität           | 2.526    | .858      | .838**                                   | .600**                                         | .121 | .750 |
| Rivalität                | 2.286    | .933      | .810**                                   | .414**                                         | .083 | .663 |
| Beteiligung              | 3.224    | .824      | -.154**                                  | .282**                                         | .136 | .774 |
| Störneigung              | 3.261    | .894      | .006                                     | -.345**                                        | .197 | .842 |
| Unterrichtsdruck         | 2.654    | .910      | .501**                                   | -.073                                          | .069 | .617 |
| Vermittlungsqualität     | 3.337    | .868      | -.219**                                  | -.001                                          | .140 | .780 |

*Anmerkungen:* *M* = Mittelwert; *SD* = Standardabweichung; *g* = Schiefe; *SF<sub>g</sub>* = Standardfehler Schiefe; *Kurt* = Kurtosis; *SF<sub>Kurt</sub>* = Standardfehler Kurtosis;  $ICC1 = \frac{\tau_x^2}{\tau_x^2 + \sigma_x^2}$ ,  $ICC2 = \frac{\tau_x^2}{\tau_x^2 + (\sigma_x^2/n_j)}$ , wobei  $\tau_x^2$  für die Varianz

zwischen,  $\sigma_x^2$  für die innerhalb der Klassen steht und  $n_j$  die durchschnittliche Klassengröße indiziert.

\* =  $p \leq .05$ ; \*\* =  $p \leq .01$ .
