# Supplementary material for: Welche Klimadimensionen misst der Linzer Fragebogen zum Schul- und Klassenklima für die 4. – 8. Klasse (LFSK 4 – 8; Eder, 2000)?
Source: Atypon-hosted journal article supplement (doi:10.1026/0012-1924/a000280), 2021-12-10
Supplement: 0012-1924_a000280_esm5.pdf [file 0012-1924_a000280_esm5.pdf]

*Elektronisches Supplement 5. Ergebnisse der Simulationsstudien.*

| Ergebnisse mit 96 Klassen  |        |          |        |       |       |       |
|----------------------------|--------|----------|--------|-------|-------|-------|
| Datei                      | KMO-MW | KMO-BCor | $p$    | RMSEA | TLI   | SRMR  |
| BCov 96.1                  | 0.929  | 0.631    | <.0001 | 0.286 | 0.645 | 0.059 |
| BCov 96.2                  | 0.915  | 0.551    | <.0001 | 0.350 | 0.587 | 0.047 |
| BCov 96.3                  | 0.921  | 0.678    | <.0001 | 0.230 | 0.748 | 0.037 |
| BCov 96.4                  | 0.938  | 0.613    | <.0001 | 0.251 | 0.778 | 0.031 |
| BCov 96.5                  | 0.932  | 0.591    | <.0001 | 0.273 | 0.703 | 0.056 |
| Ergebnisse mit 300 Klassen |        |          |        |       |       |       |
| BCov 300.1                 | 0.952  | 0.943    | .0281  | 0.060 | 0.981 | 0.023 |
| BCov 300.2                 | 0.952  | 0.939    | .0225  | 0.062 | 0.980 | 0.027 |
| BCov 300.3                 | 0.940  | 0.919    | .0078  | 0.069 | 0.971 | 0.029 |
| BCov 300.4                 | 0.948  | 0.949    | .7795  | 0.000 | 1.000 | 0.021 |
| BCov 300.5                 | 0.946  | 0.926    | .0023  | 0.075 | 0.971 | 0.027 |

*Anmerkungen:* Die Simulationen wurden analog zur Struktur von Modell 3a durchgeführt, ausgehend von perfekt zum Modell passenden Rohdaten im Stichprobenumfang von 96 bzw. 300 Klassen. KMO-MW = Kaiser-Meyer-Olkin Index zur Korrelationsmatrix der Klassenmittelwerte, KMO-BCor = Kaiser-Meyer-Olkin Index zu der von Plus berechneten Between-Korrelationsmatrix, RMSEA = root, mean square error of approximation, TLI = Tucker-Lewis Index, SRMR = standardized root mean square residual. Wie die Ergebnisse zeigen, führt die von Mplus berechnete BCov-Matrix auf Basis von 96 Klassen zu drastisch schlechteren Ergebnissen im Vergleich zu der von Mplus berechneten BCov-Matrix auf Basis von 300 Klassen.
