# Supplementary material for: Welche Klimadimensionen misst der Linzer Fragebogen zum Schul- und Klassenklima für die 4. – 8. Klasse (LFSK 4 – 8; Eder, 2000)?
Source: Atypon-hosted journal article supplement (doi:10.1026/0012-1924/a000280), 2021-12-10
Supplement: 0012-1924_a000280_esm6.pdf [file 0012-1924_a000280_esm6.pdf]

*Elektronisches Supplement 6. Standardisierte Ladungen der Klimaelemente auf den latenten Klimadimensionen.*

| Klimafaktor                | Klimaelement         | Modell |        |        |       |        |
|----------------------------|----------------------|--------|--------|--------|-------|--------|
|                            |                      | 1      | 2      | 3a     | 5     |        |
| Schülerzentriertheit       | Engagement           | 0.730  | 0.683  | 0.974  | L1    | 0.682  |
|                            |                      |        |        |        | L2    | 0.973  |
|                            | Mitsprache           | 0.741  | 0.716  | 0.917  | L1    | 0.717  |
|                            |                      |        |        |        | L2    | 0.929  |
|                            | Vermittlungsqualität | 0.819  | 0.800  | 0.962  | L1    | 0.798  |
|                            |                      |        |        |        | L2    | 0.975  |
|                            | Schülerbeteiligung   | 0.811  | 0.801  | 0.905  | L1    | 0.801  |
|                            |                      |        |        |        | L2    | 0.924  |
|                            | Kontrolle            | 0.542  | 0.489  | 1.211  | L1    | 0.486  |
|                            |                      |        |        |        | L2    | 1.232  |
|                            | Gerechtigkeit        | 0.308  | 0.259  | 0.750  | L1    | 0.257  |
|                            |                      |        |        |        | L2    | 0.711  |
| Lerngemeinschaft           | Gemeinschaft         | 0.559  | 0.565  | 0.516  | L1    | 0.564  |
|                            |                      |        |        |        | L2    | 0.581  |
|                            | Lernbereitschaft     | 0.703  | 0.652  | 1.000  | L1    | 0.652  |
|                            |                      |        |        |        | L2    | 0.999  |
| Rivalität und Störung      | Rivalität            | 0.645  | 0.647  | 0.571  | L1    | 0.647  |
|                            |                      |        |        |        | L2    | 0.799  |
|                            | Störneigung          | 0.558  | 0.510  | 0.798  | L1    | 0.511  |
|                            |                      |        |        |        | L2    | 0.638  |
| Sozial- und Leistungsdruck | Restriktivität       | 0.670  | 0.626  | 0.937  | L1    | 0.625  |
|                            |                      |        |        |        | L2    | 0.921  |
|                            | Gerechtigkeit        | -0.510 | -0.516 | -0.228 | L1    | -0.515 |
|                            |                      |        |        |        | L2    | -0.277 |
| Komparation                | 0.668                | 0.654  | 0.909  | L1     | 0.648 |        |
|                            |                      |        |        | L2     | 0.909 |        |

| Klimafaktor                | Klimaelement     | Modell |       |       |    |       |  |
|----------------------------|------------------|--------|-------|-------|----|-------|--|
|                            |                  | 1      | 2     | 3a    | 5  |       |  |
| Sozial- und Leistungsdruck | Leistungsdruck   | 0.431  | 0.463 | 0.298 | L1 | 0.463 |  |
|                            |                  |        |       |       | L2 | 0.276 |  |
|                            | Unterrichtsdruck | 0.727  | 0.740 | 0.633 | L1 | 0.739 |  |
|                            |                  |        |       |       | L2 | 0.775 |  |
|                            | Kontrolle        | 0.251  | 0.248 | 0.648 | L1 | 0.246 |  |
|                            |                  |        |       |       | L2 | 0.623 |  |

*Anmerkung:* Zur Beschreibung der Modellvarianten siehe Tabelle 1.
