# Supplementary material for: Welche Klimadimensionen misst der Linzer Fragebogen zum Schul- und Klassenklima für die 4. – 8. Klasse (LFSK 4 – 8; Eder, 2000)?
Source: Atypon-hosted journal article supplement (doi:10.1026/0012-1924/a000280), 2021-12-10
Supplement: 0012-1924_a000280_esm7.pdf [file 0012-1924_a000280_esm7.pdf]

*Elektronisches Supplement 7. Korrelationen zwischen den latenten Klimafaktoren.*

|                            | Schüler-<br>zentriertheit | Lern-<br>gemeinschaft | Sozial- und<br>Leistungsdruck | Rivalität und<br>Störung |
|----------------------------|---------------------------|-----------------------|-------------------------------|--------------------------|
| Schülerzentriertheit       |                           | .921                  | -.819                         | -.713                    |
| Lerngemeinschaft           | .795                      |                       | -.721                         | -.827                    |
| Sozial- und Leistungsdruck | -.540                     | -.239                 |                               | .849                     |
| Rivalität und Störung      | -.353                     | -.356                 | .864                          |                          |

*Anmerkung:* Oberhalb der Diagonale sind die Korrelationskoeffizienten auf Ebene der Schulklassen dargestellt, unterhalb der Diagonale die auf Ebene der Schülerinnen und Schüler.
